# Supplementary material for: Application of flow cytometry and cell sorting to the bacterial analysis of environmental aerosol samples
Source: Royal Society of Chemistry journal article supplement (doi:10.1039/b710512f), 2007-01-01
Supplement: b710512f.pdf [file b710512f.pdf]

| Sample | FSC Mean | FSC Mode | SSC Mean | SSC Mode | Gate FSC | Gate SSC | group | Identification             | Accession Number   |
|--------|----------|----------|----------|----------|----------|----------|-------|----------------------------|--------------------|
| 1A     | 2.93     | 2.76     | 50.64    | 30.23    | 2        | 10       | a     | Paenibacillus ginsengagri  | AB245383 - 99.8    |
| 1B     | 6.18     | 5.94     | 37.76    | 39.6     | 2        | 10       | b     | Phyllobacterium sp.        | EF035066 - 100.0   |
| 1C     | 5.82     | 6.1      | 38.14    | 36.85    | 2        | 10       | c     | Variovorax paradoxus       | AF532868.1 - 99.8  |
| 2A     | 4.1      | 4.49     | 23.96    | 23.93    | 2        | 25       | b     | Phyllobacterium sp.        | EF035066 - 100.0   |
| 2B     | 6.29     | 6.32     | 39.96    | 40.32    | 2        | 25       | d     | Variovorax paradoxus       | AF532868 - 100.0   |
| 2C     | 10.76    | 11.55    | 56.64    | 50.94    | 2        | 25       | e     | Burkholderia stabilis      | EF208635 - 100.0   |
| 3A     | 3.88     | 4.26     | 21.74    | 23.08    | 2        | 65       | b     | Phyllobacterium sp.        | EF035066 - 100.0   |
| 3B     | 4.25     | 4.78     | 23.97    | 22.88    | 2        | 65       | b     | Phyllobacterium sp.        | EF035066 - 100.0   |
| 3C     | 4.09     | 4.74     | 22.68    | 23.08    | 2        | 65       | b     | Phyllobacterium sp.        | EF035066 - 100.0   |
| 4A     | 5.06     | 6.04     | 30.25    | 32.78    | 4        | 15       | f     | Variovorax paradoxus       | AF532868.1 - 99.8  |
| 4B     | 6.65     | 7.84     | 38.38    | 39.6     | 4        | 15       | g     | Variovorax paradoxus       | AF532868.1 - 100.0 |
| 4C     | 6.23     | 6.55     | 35.12    | 36.85    | 4        | 15       | g     | Variovorax paradoxus       | AF532868.1 - 99.5  |
| 5A     | 5.88     | 6.21     | 33.87    | 33.98    | 4        | 40       | g     | Variovorax sp.             |                    |
| 5B     | 3.86     | 4.66     | 21.78    | 24.8     | 4        | 40       | b     | Phyllobacterium sp.        | EF035066 - 100.0   |
| 5C     | 5.45     | 5.19     | 35.18    | 39.95    | 4        | 40       | c     | Variovorax paradoxus       | AF532868.1 - 100.0 |
| 6A     | 3.47     | 3.16     | 48.11    | 29.96    | 4        | 100      | a     | Paenibacillus lautus       | DQ299946 - 99.3    |
| 6B     | 12.61    | 13.34    | 96.31    | 109.4    | 4        | 100      | c     | Paenibacillus amylolyticus | DQ313379 - 99.5    |
| 6C     | 765.7    | 813.1    | 729.9    | 626.4    | 4        | 100      | h     | Cryptococcus vishniacii    | AB032657.1 - 99.9  |
| 7A     | 10.85    | 10.75    | 49.77    | 47.4     | 10       | 25       | h     | Burkholderia cepacia       | EF031062 - 100.0   |
| 7B     | 5.52     | 6.15     | 31.4     | 31.91    | 10       | 25       | g     | Variovorax paradoxus       | AF532868.1 - 99.5  |
| 7C     | 8.45     | 10.37    | 43.01    | 39.95    | 10       | 25       | i     | Sphingomonas sp.           | AY359846 - 100.0   |
| 8A     | 43.92    | 14.07    | 182.9    | 230.8    | 10       | 80       | h     | Rhodococcus erythropolis   | EF491951 - 96.5    |
| 8B     | 6.68     | 7.43     | 36.69    | 36.52    | 10       | 80       | g     | Variovorax paradoxus       | AB008000.1 - 99.8  |
| 8C     | 34.41    | 25.95    | 150.5    | 187.7    | 10       | 80       | j     | Rhodococcus sp.            | EF540506 - 100.0   |
| 9A     | 56.15    | 95.6     | 224.7    | 230.8    | 10       | 250      | h     | Rhodococcus erythropolis   | EF491951 - 100.0   |
| 9B     | 8.72     | 9.82     | 47.42    | 44.11    | 10       | 250      | h     | Burkholderia sp.           | EF555575.1 - 98.3  |
| 9C     | 35.37    | 25.95    | 147.5    | 207.2    | 10       | 250      | j     | Rhodococcus sp.            | EF540506 - 100.0   |
| 10A    | 10.78    | 12.3     | 54.51    | 48.7     | 28       | 100      | h     | Burkholderia stabilis      | AY616143 - 100.0   |
| 10B    | 35.18    | 34.29    | 57.21    | 56.74    | 28       | 100      | k     | Methylobacterium sp.       | AY569294 - 99.5    |
